# Supplementary material for: Pten Regulates Epithelial Cytodifferentiation during Prostate Development
Source: PLoS One. 2015 Jun 15;10(6):e0129470. doi: 10.1371/journal.pone.0129470 (PMC4468205; doi:10.1371/journal.pone.0129470)
Supplement: S4 Table — (XLSX) [file pone.0129470.s006.xlsx]

## Sheet: Table S4
Table S4. Potential AR regulated and Pten regulated genes from the Androgen Responsive Gene Database (ARGDB)
ARGDB output of the differentially expressed genes from the Nkx:Cre; Ptenfl/fl microarray data
Gene Symbol	ID	Species analysed
ALDH2	217	Homo sapiens
ANXA1	301	Homo sapiens
FAS	355	Homo sapiens
FASLG	356	Homo sapiens
BMPR1B	658	Homo sapiens
CD40	958	Homo sapiens
CKMT1B	1159	Homo sapiens
CLU	1191	Homo sapiens
CTGF	1490	Homo sapiens
DBI	1622	Homo sapiens
DEFB1	1672	Homo sapiens
FDFT1	2222	Homo sapiens
HMGCS2	3158	Homo sapiens
HSD11B2	3291	Homo sapiens
IFIT1	3434	Homo sapiens
IGFBP1	3484	Homo sapiens
CYR61	3491	Homo sapiens
INSIG1	3638	Homo sapiens
LCP1	3936	Homo sapiens
ME1	4199	Homo sapiens
NKX3-1	4824	Homo sapiens
OAS2	4939	Homo sapiens
TNFRSF11B	4982	Homo sapiens
ACSM3	6296	Homo sapiens
SC4MOL	6307	Homo sapiens
SCNN1A	6337	Homo sapiens
SGK1	6446	Homo sapiens
SNAP25	6616	Homo sapiens
TGM4	7047	Homo sapiens
TMPRSS2	7113	Homo sapiens
TNFAIP3	7128	Homo sapiens
VDR	7421	Homo sapiens
PSCA	8000	Homo sapiens
PIK3R3	8503	Homo sapiens
CFLAR	8837	Homo sapiens
SELENBP1	8991	Homo sapiens
ARHGAP29	9411	Homo sapiens
FGFBP1	9982	Homo sapiens
NDRG1	10397	Homo sapiens
Adcy8	11514	Mus musculus
Alpl	11647	Mus musculus
Aldh1a1	11668	Mus musculus
Cyp2b10	13088	Mus musculus
Klk1b9	13648	Mus musculus
Fdft1	14137	Mus musculus
Ctgf	14219	Mus musculus
Anxa1	16952	Mus musculus
Lpl	16956	Mus musculus
Ltbr	17000	Mus musculus
Me1	17436	Mus musculus
Tnfrsf11b	18383	Mus musculus
Enpp2	18606	Mus musculus
Pnliprp1	18946	Mus musculus
Acsm3	20216	Mus musculus
Cxcl15	20309	Mus musculus
Smr2	20600	Mus musculus
Spink3	20730	Mus musculus
Spp1	20750	Mus musculus
Sult1e1	20860	Mus musculus
Inmt	21743	Mus musculus
SSBP2	23635	Homo sapiens
Aldh1a1	24188	Rattus norvegicus
Lpl	24539	Rattus norvegicus
Tnf	24835	Rattus norvegicus
Clu	24854	Rattus norvegicus
Scgb2a1	25010	Rattus norvegicus
Scnn1a	25122	Rattus norvegicus
Tnfrsf11b	25341	Rattus norvegicus
Spp1	25353	Rattus norvegicus
Cyp51	25427	Rattus norvegicus
Fgf10	25443	Rattus norvegicus
Sbp	25540	Rattus norvegicus
Alpl	25586	Rattus norvegicus
Tnfrsf1a	25625	Rattus norvegicus
RAD54B	25788	Homo sapiens
TNFAIP8	25816	Homo sapiens
Ceacam10	26366	Mus musculus
Mapk14	26416	Mus musculus
Adcy8	29241	Rattus norvegicus
Fdft1	29580	Rattus norvegicus
Psme1	29630	Rattus norvegicus
Gria1	50592	Rattus norvegicus
Nsbp1	50887	Mus musculus
ADIPOR1	51094	Homo sapiens
VTA1	51534	Homo sapiens
Slc40a1	53945	Mus musculus
Pbsn	54192	Mus musculus
Pbsn	54193	Rattus norvegicus
DDIT4	54541	Homo sapiens
Krt71	56735	Mus musculus
PMEPA1	56937	Homo sapiens
Kcne3	57442	Mus musculus
Ctgf	64032	Rattus norvegicus
TINAGL1	64129	Homo sapiens
Insig1	64194	Rattus norvegicus
Srd5a2	64677	Rattus norvegicus
MRPS6	64968	Homo sapiens
Sc4mol	66234	Mus musculus
Bpil1	66557	Mus musculus
Bdh1	71911	Mus musculus
Psca	72373	Mus musculus
Lrg1	76905	Mus musculus
9530002B09Rik	77432	Mus musculus
STEAP4	79689	Homo sapiens
Defb1	83687	Rattus norvegicus
EPSTI1	94240	Homo sapiens
Tinagl1	94242	Mus musculus
Ly6a	110454	Mus musculus
Lyve1	114332	Mus musculus
OSBPL11	114885	Homo sapiens
Steap4	117167	Mus musculus
MBOAT2	129642	Homo sapiens
Sc4mol	140910	Rattus norvegicus
Lcn2	170496	Rattus norvegicus
Nme1	191575	Rattus norvegicus
Tspan8	216350	Mus musculus
SLC35F1	222553	Homo sapiens
Slc30a2	230810	Mus musculus
Insig1	231070	Mus musculus
LPCAT4	254531	Homo sapiens
Nkx3-1	305999	Rattus norvegicus
KRT73	319101	Homo sapiens
Tgm4	331046	Mus musculus
Tlcd2	380712	Mus musculus
